# Supplementary material
Source: PubMed Central journal article supplement (PMC8448973)

## **Unedited Immunoblot Gels**

**Fig. 2A**

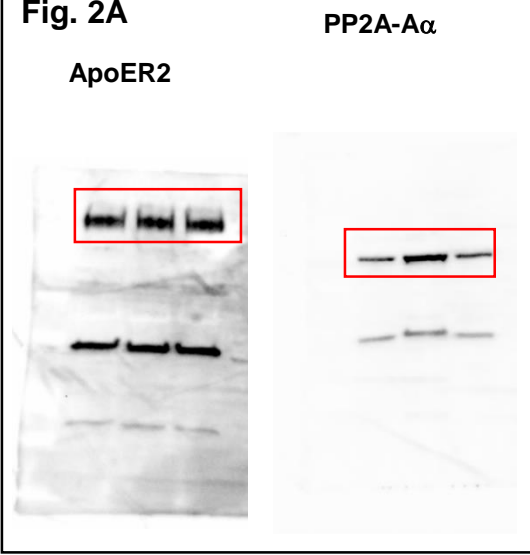

**Fig. 2H**

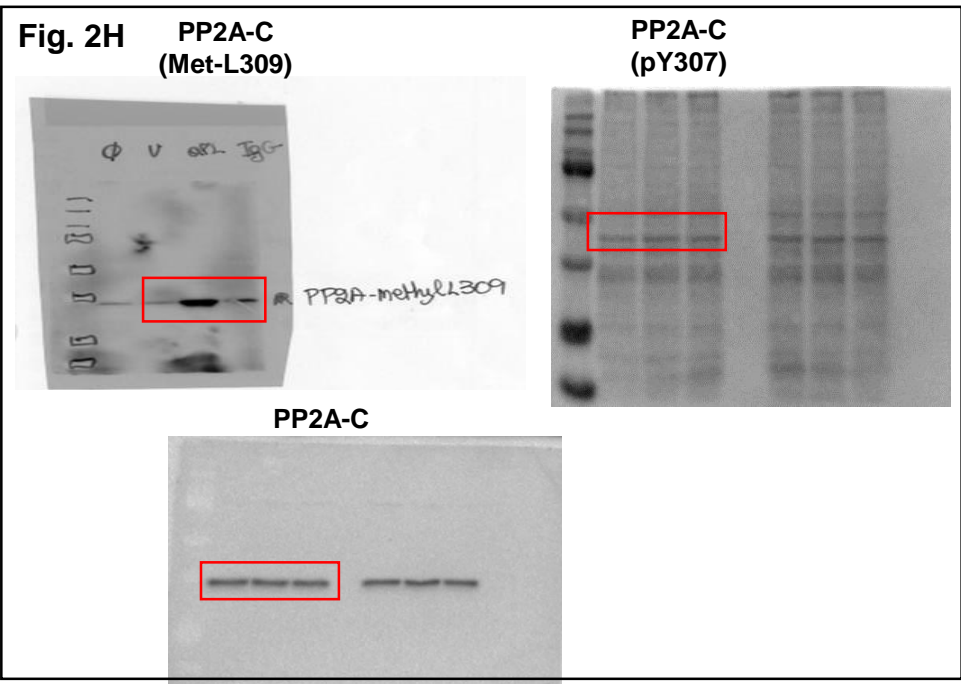

**Fig. 2E**

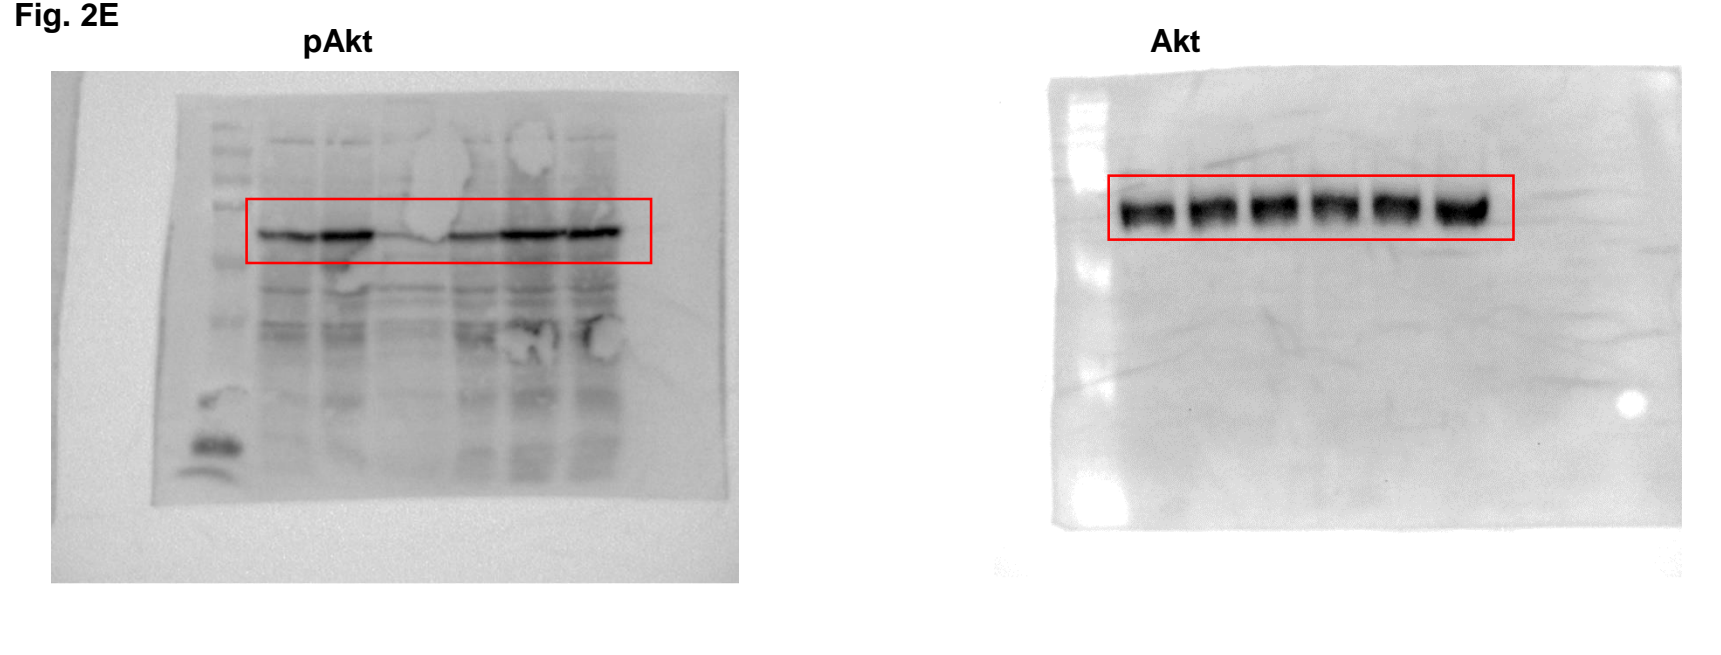

**Fig. 3A** ApoER2

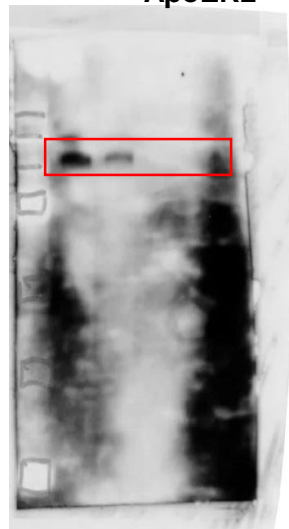

**GAPDH**

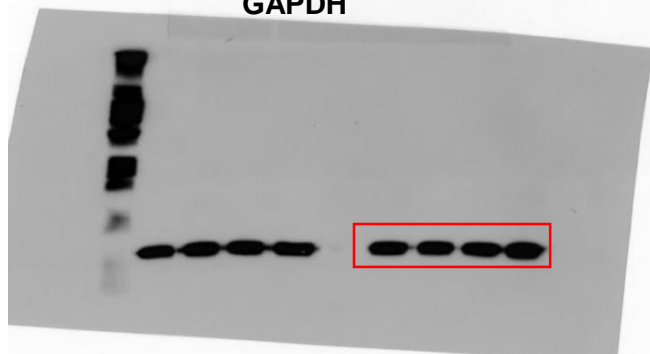

**Fig. 3E** JIP4

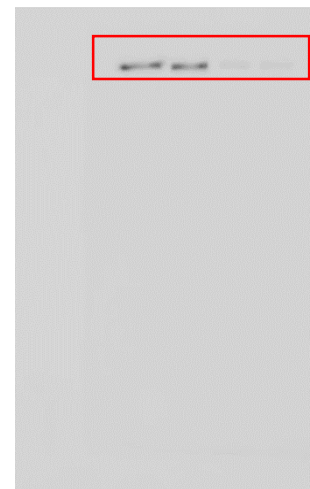

**GAPDH**

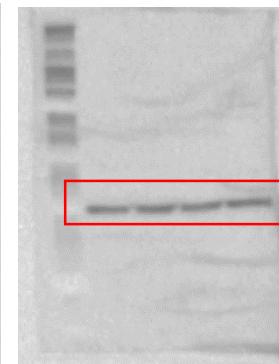

**Fig. 3C**

**ApoER2**

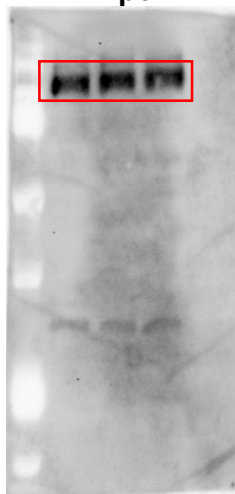

**Dab2**

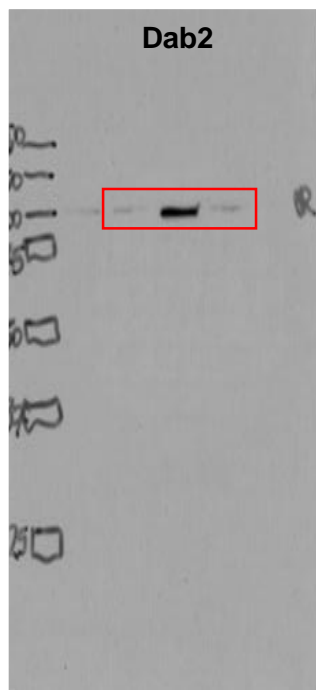

**JIP4**

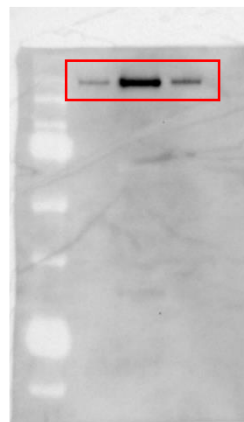

**PP2A-A $\alpha$**

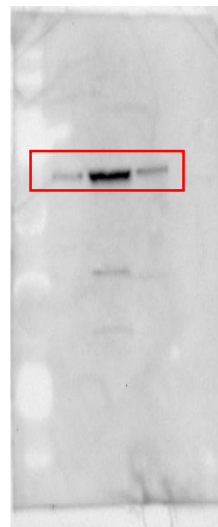

**PP2A-C  
(Met-L309)**

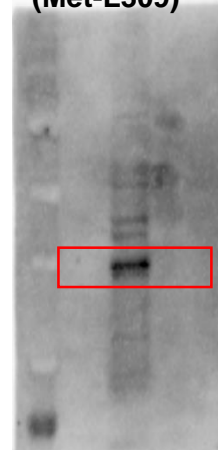

**Fig. 3D**

**ApoER2**

**Dab2**

**JIP4**

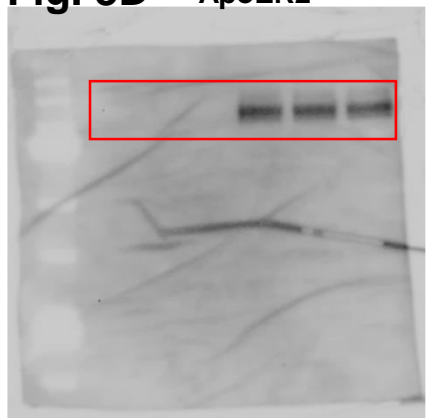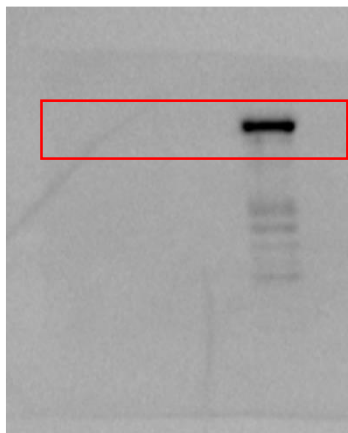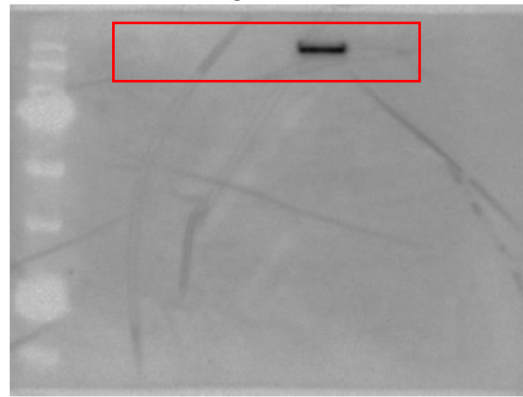

**ApoER2**

**Dab2**

**JIP4**

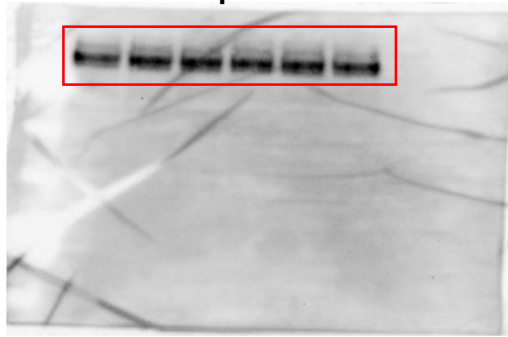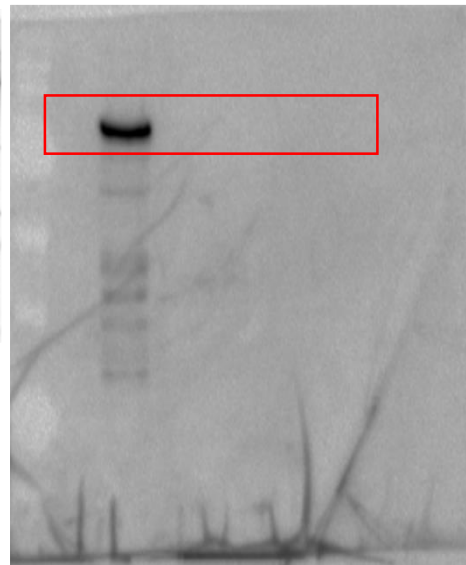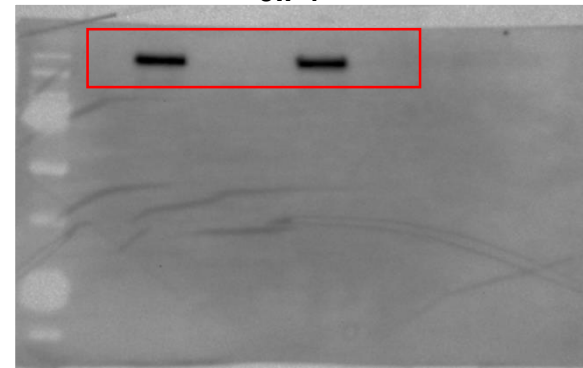

**ApoER2**

**Dab2**

**JIP4**

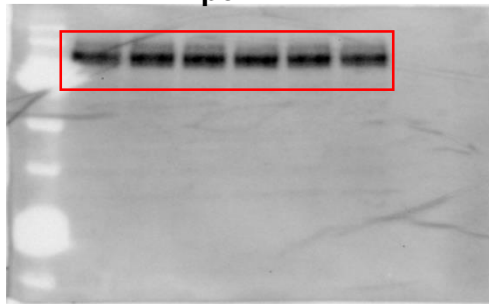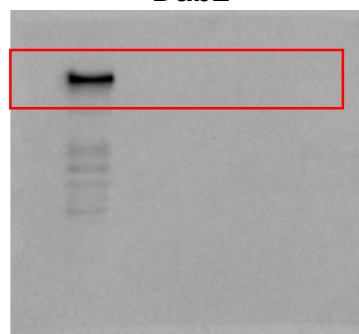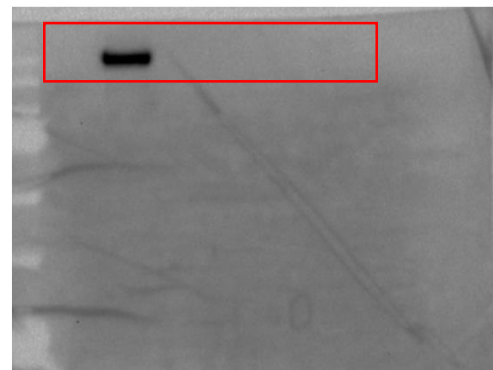

**Fig. 4A**

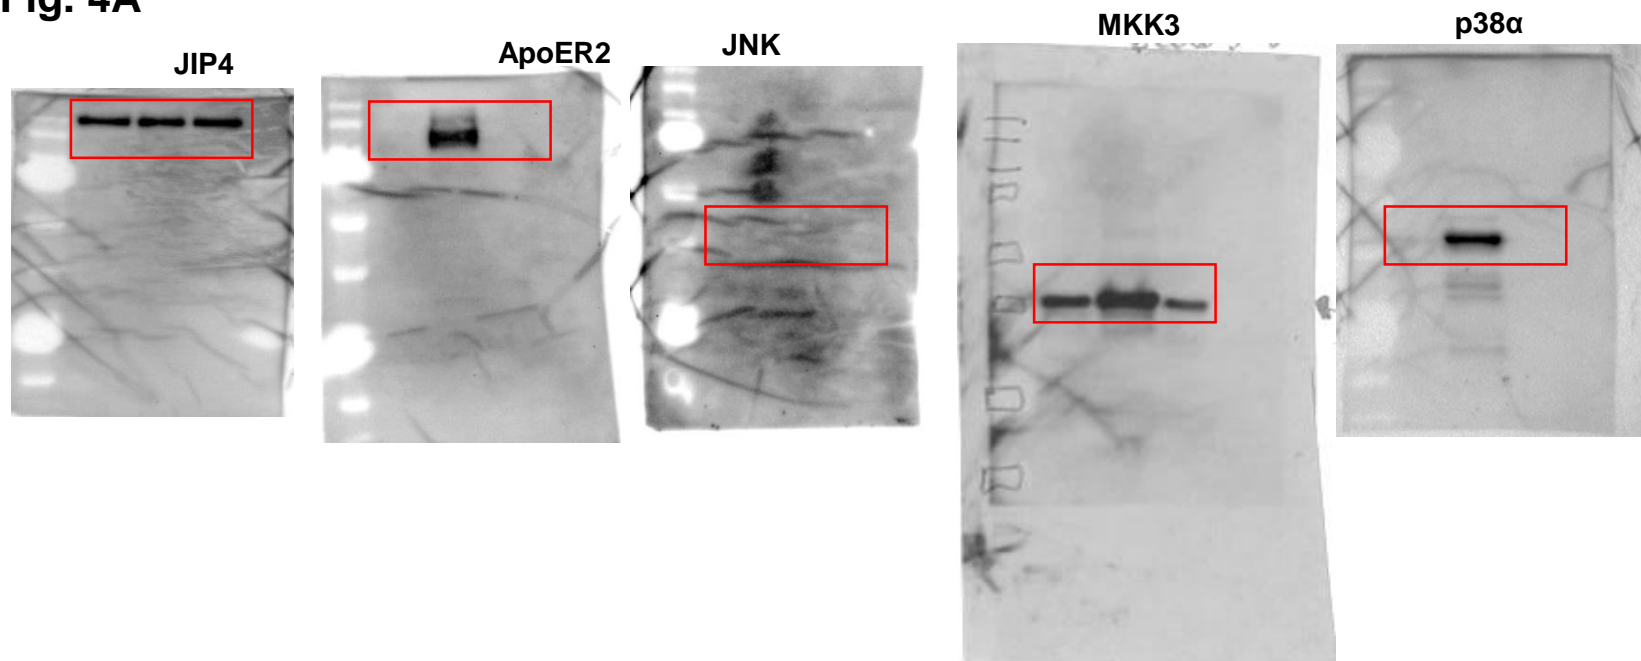

**Fig. 4E**

PP2A-C  
(MetL309)

PP2A-C

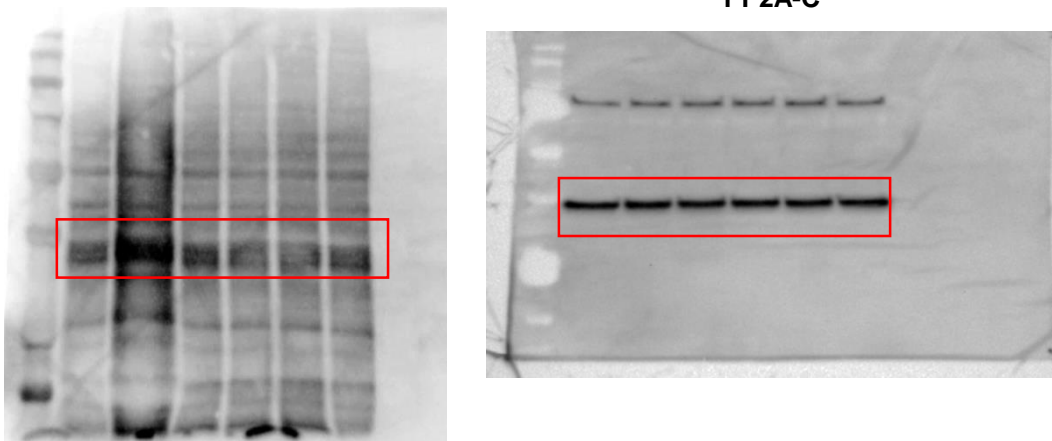

**Fig. 4F**

**MKK3**

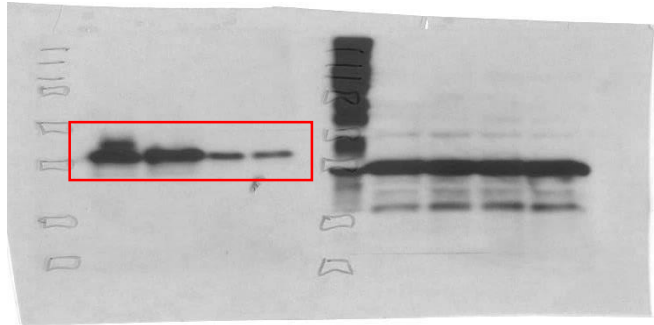

**GAPDH**

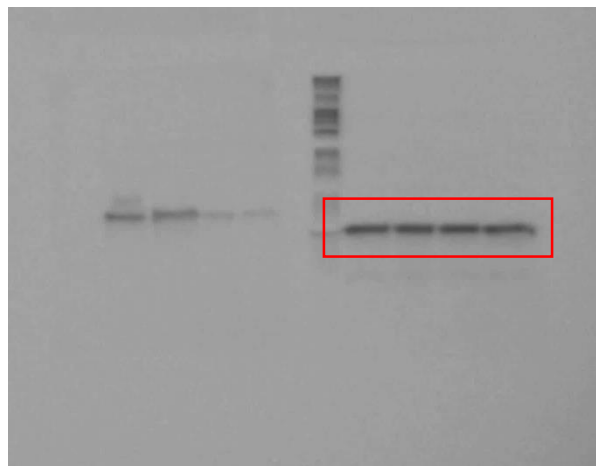

**p-p38 $\alpha$**

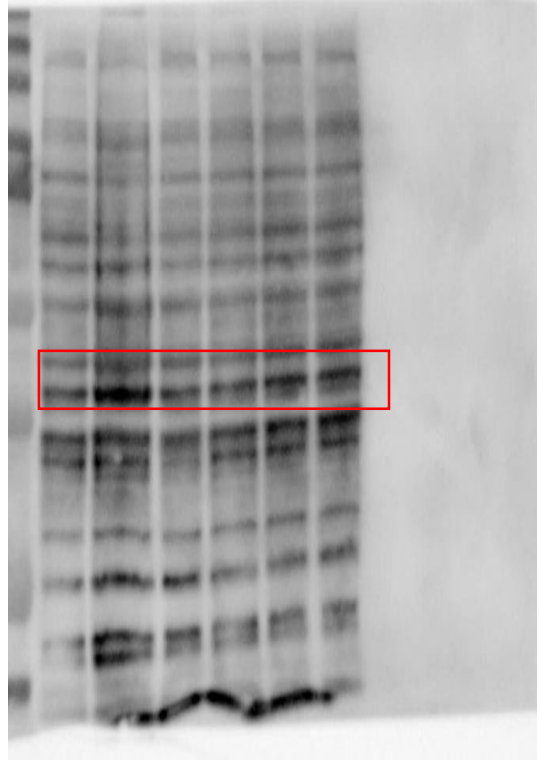

**p38 $\alpha$**

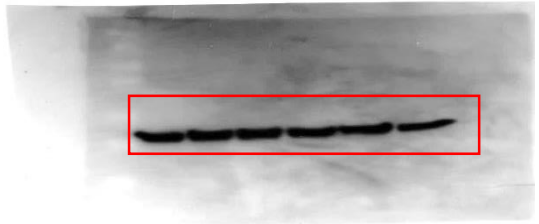

100  $\mu$ g S.F.  $\rightarrow$  T-03

**Fig. 5C**

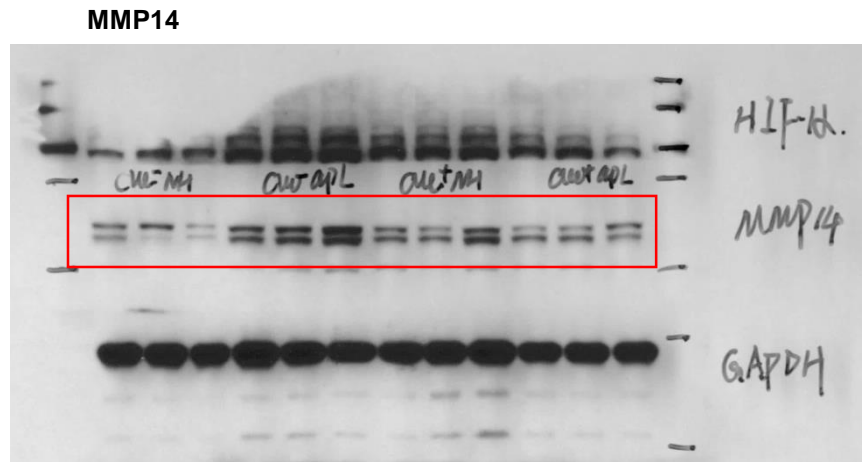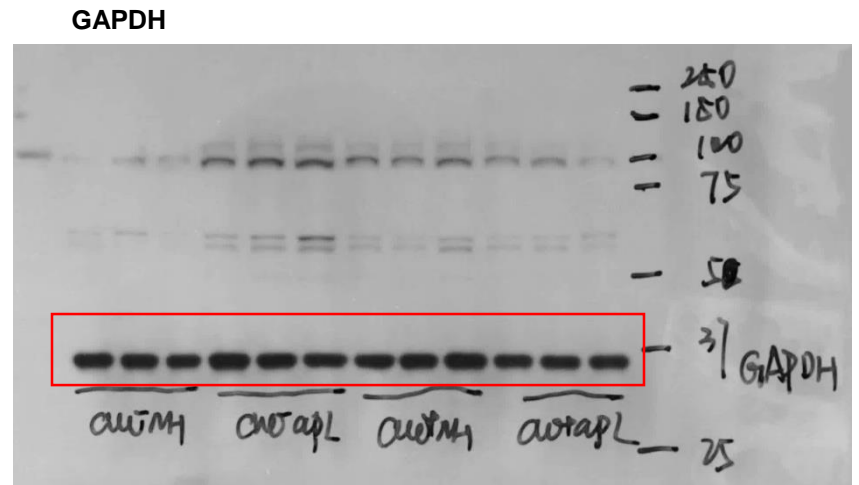

**Fig. 5E**

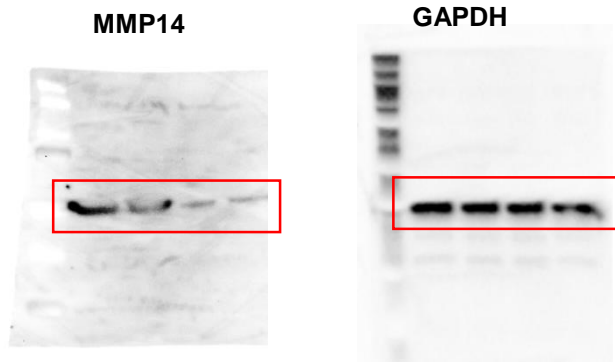



**Fig. 7I**

HIF-1 $\alpha$

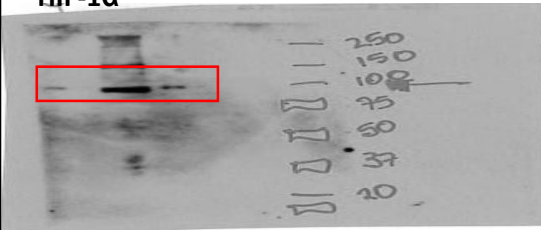

pPHD2

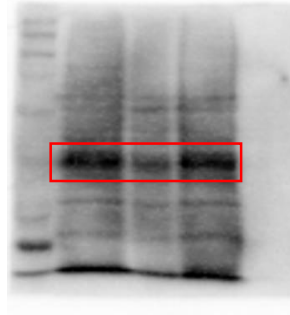

PHD2

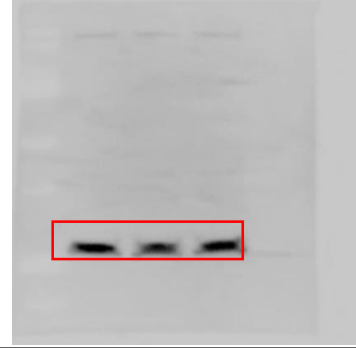

GAPDH

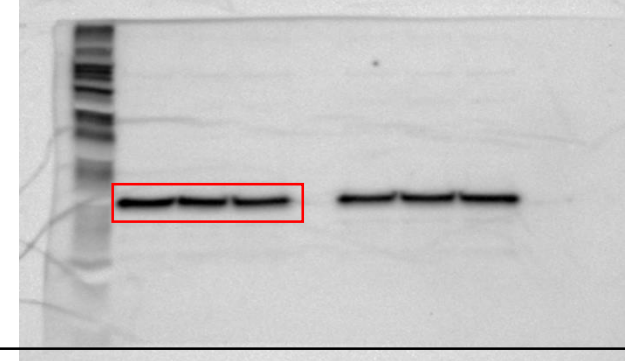

**Fig. 7J**

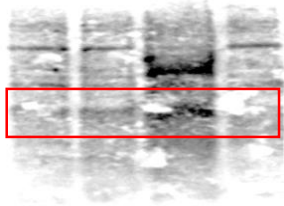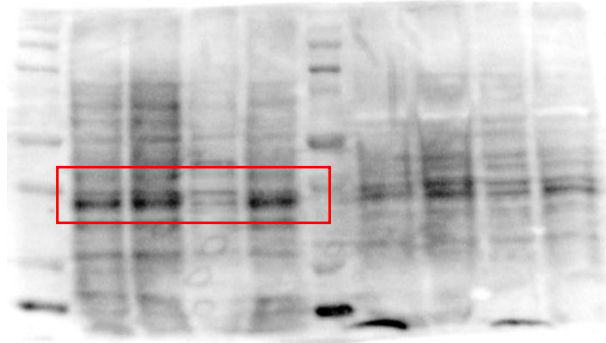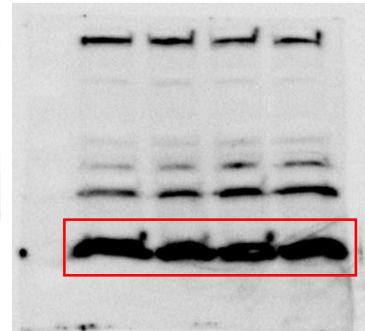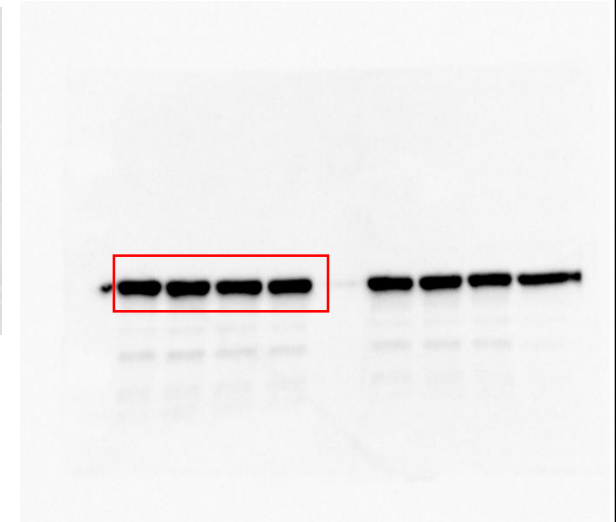



**Fig. 8C**

**PP2A-C  
(Met-L309)**

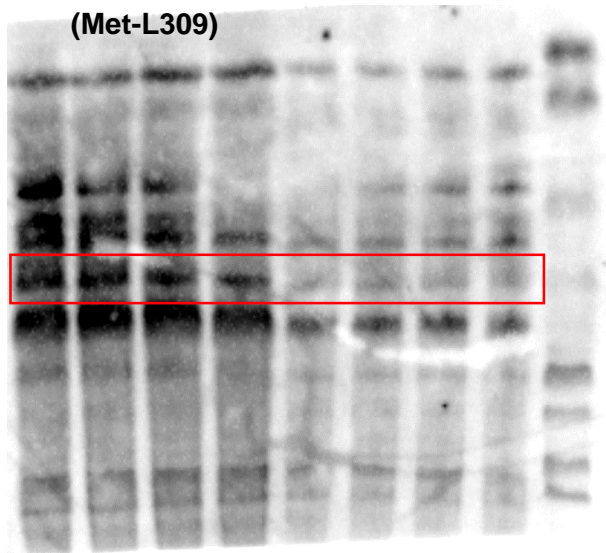

**PP2A-C**

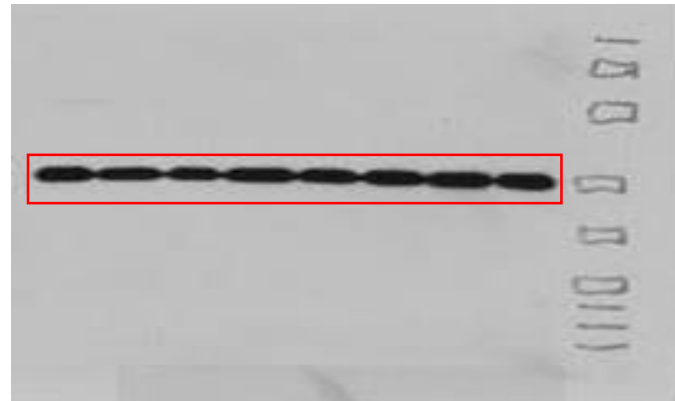

**p-PHD2**

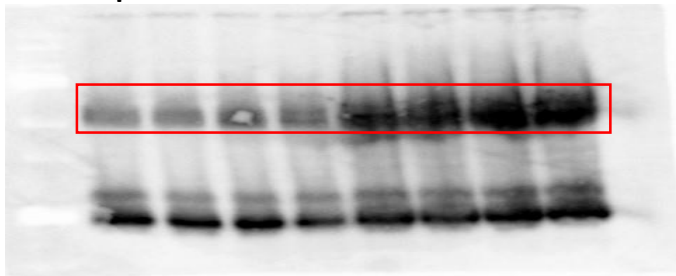

**PHD2**

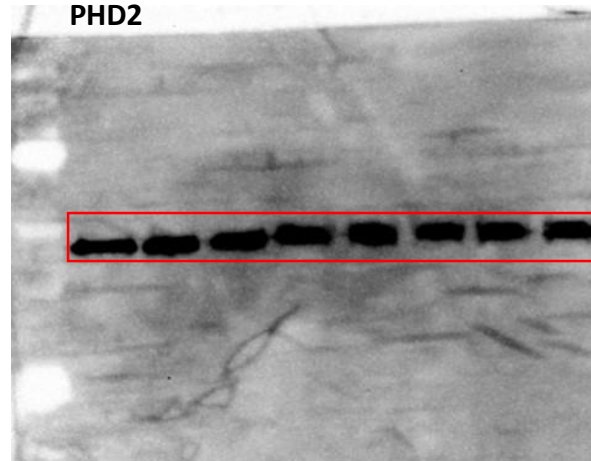

**HIF-1 $\alpha$**

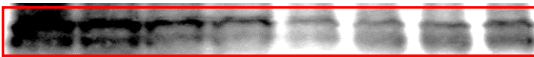

**GAPDH**

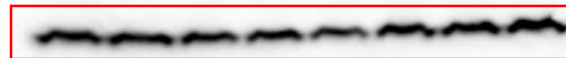

**Fig. 8E**

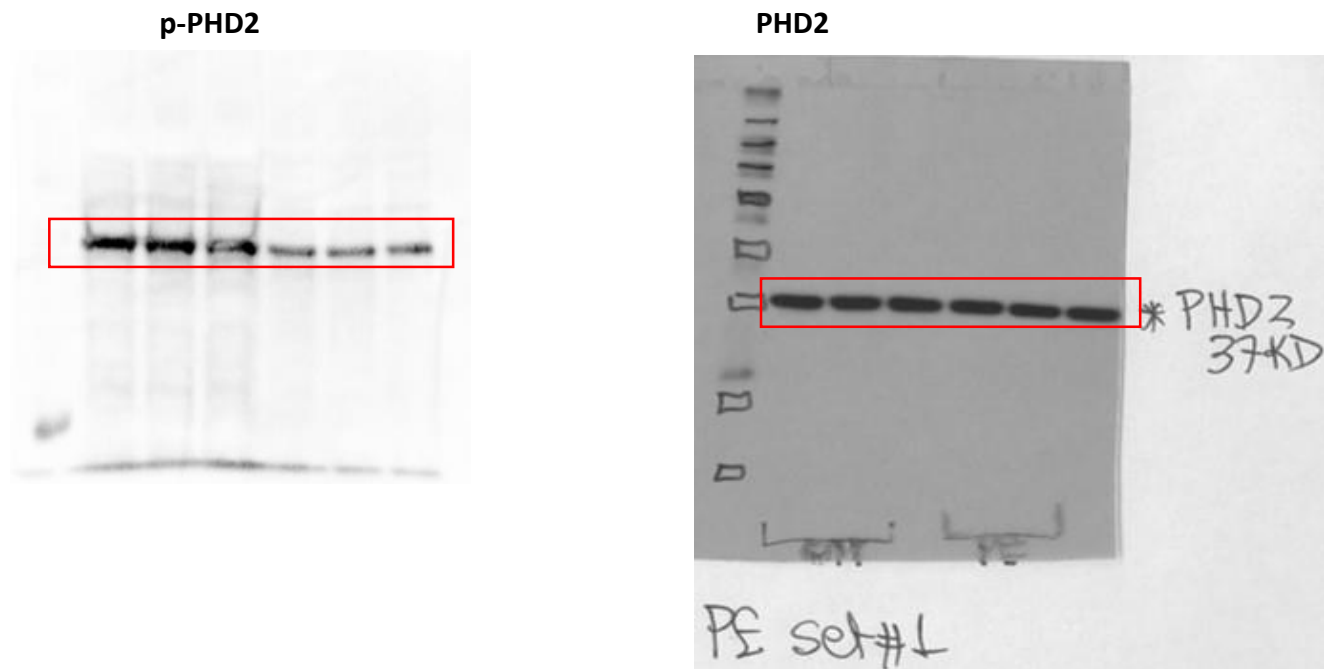

**Fig. 8G**

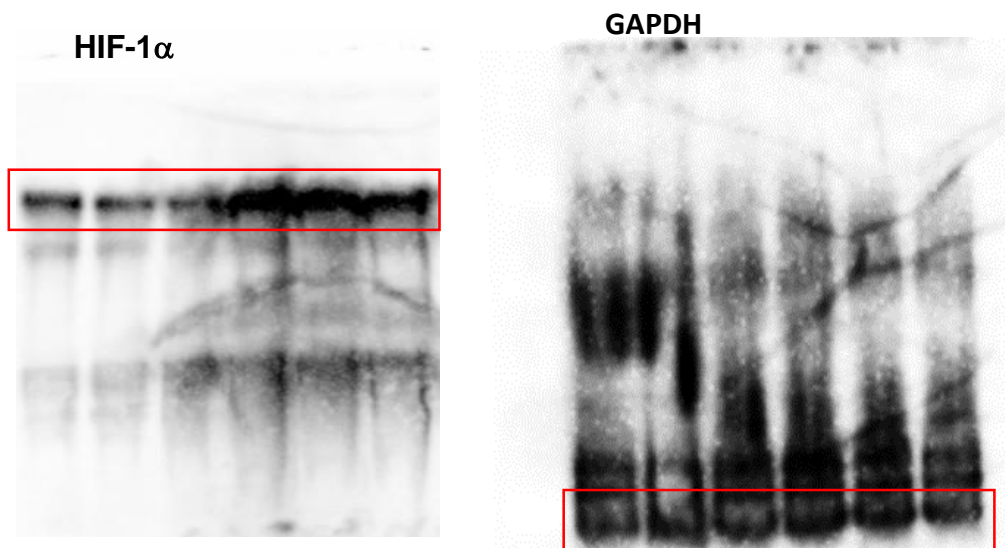

Fig. 8F

Human PE placenta (IP)

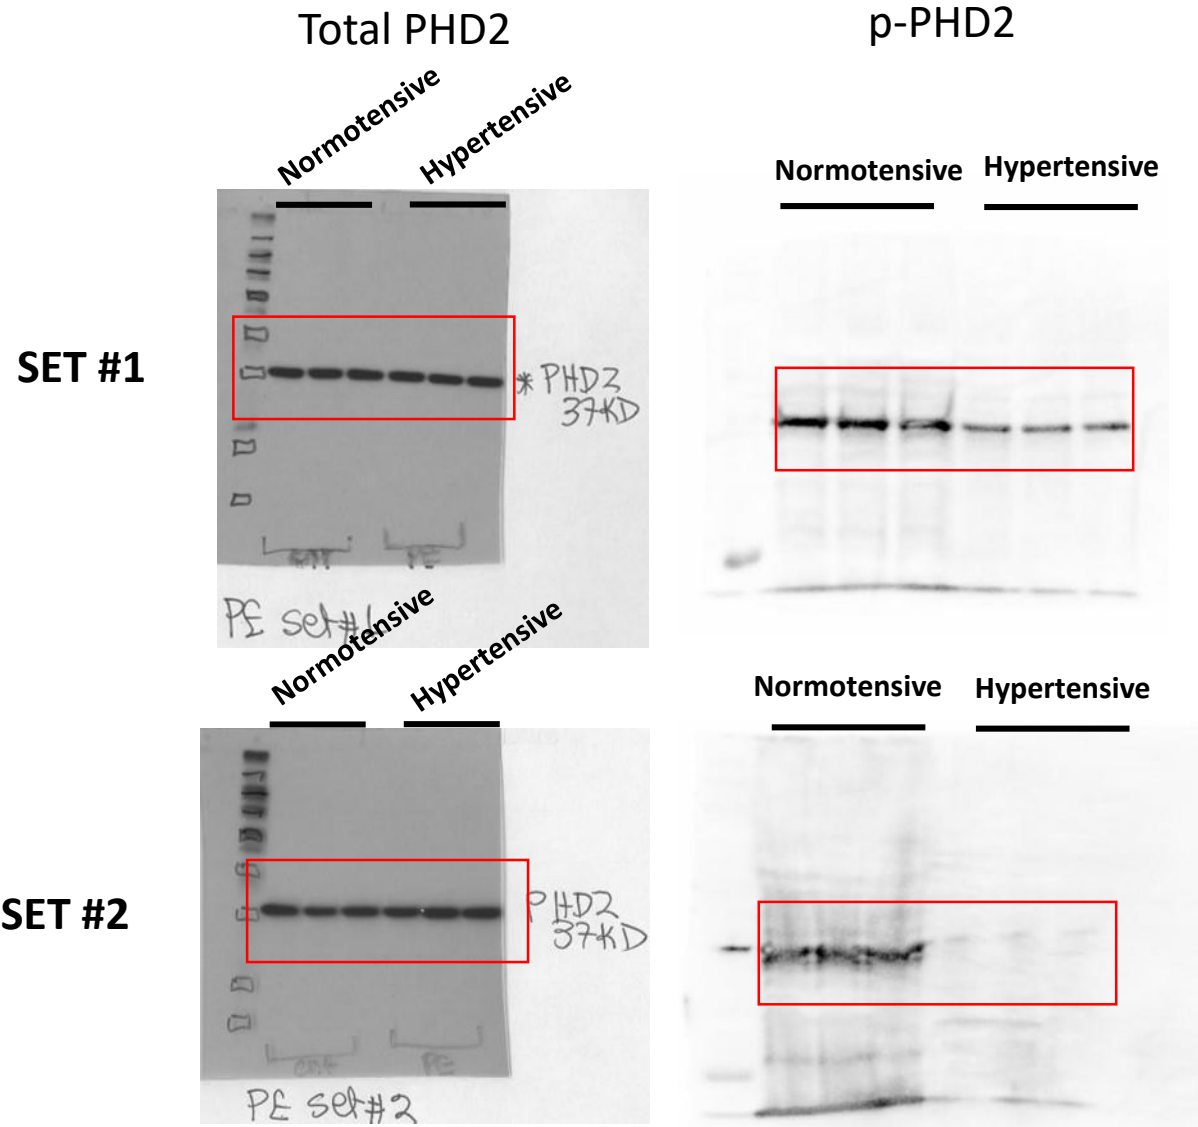

## **Unedited Immunoblot Gels (Supplemental Data)**

## Supplemental Fig. S2C

PP2A-A

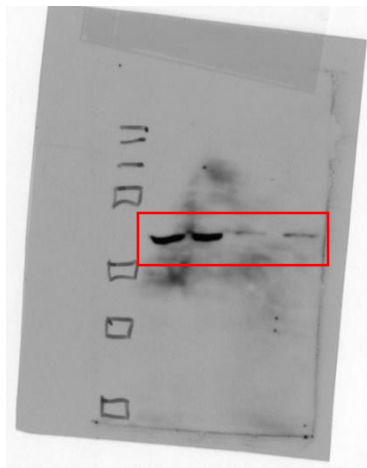

GAPDH

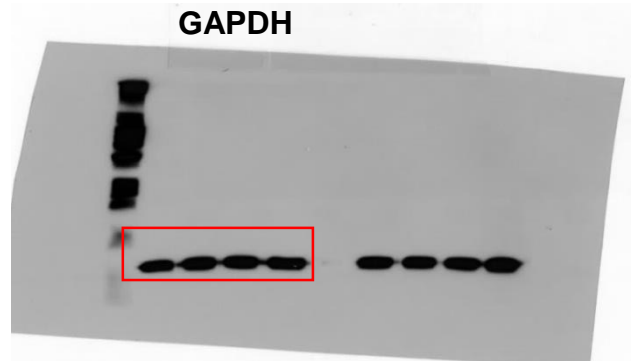

## Supplemental Fig. S2D

PP2A-A

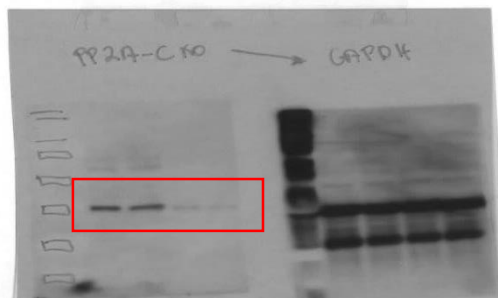

GAPDH

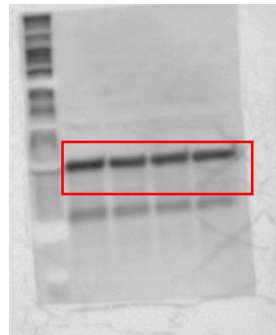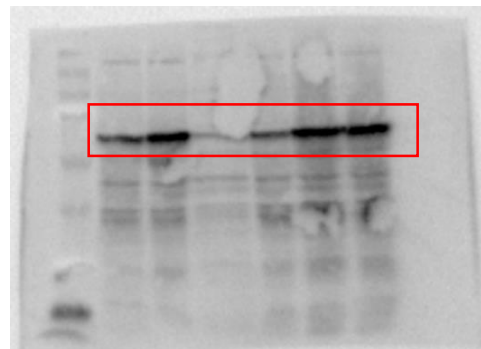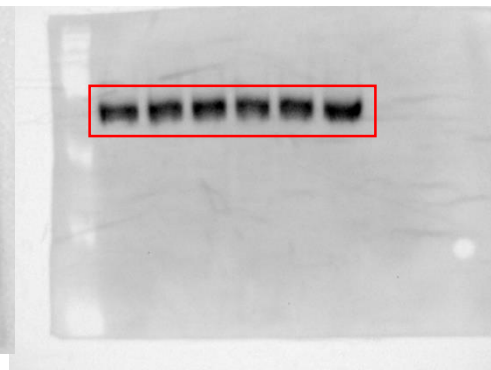

# Supplemental Fig. S3C

PP2A-B $\delta$

GAPDH

pAkt

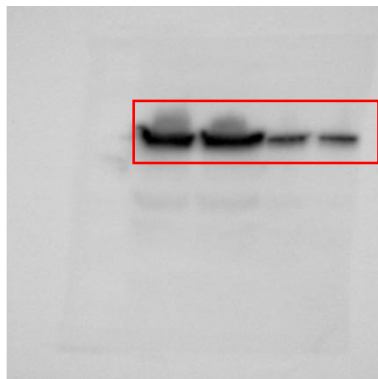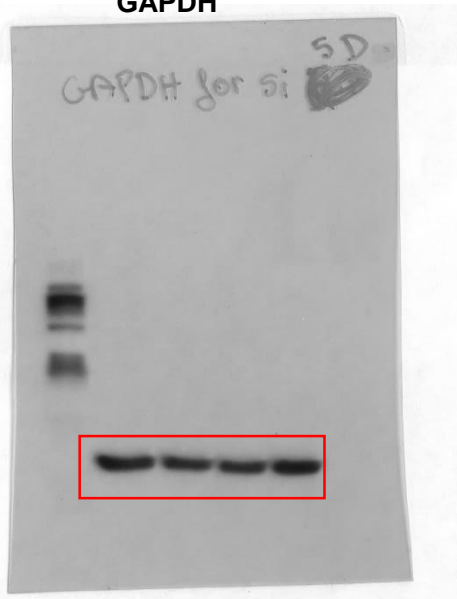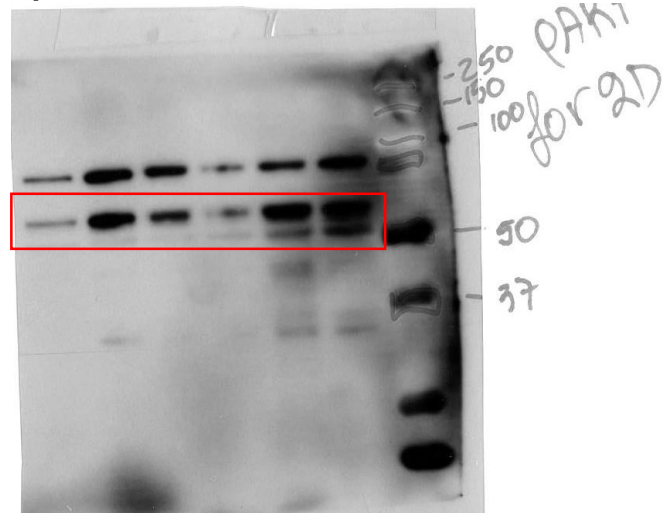

Akt

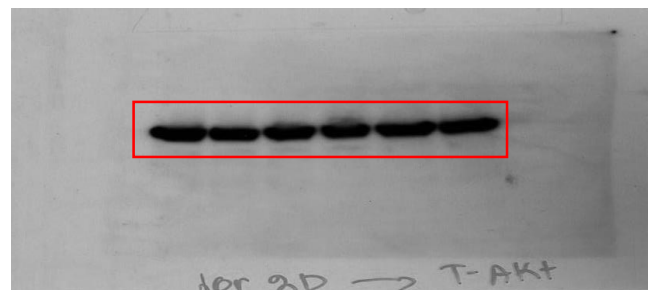

pAkt

Akt

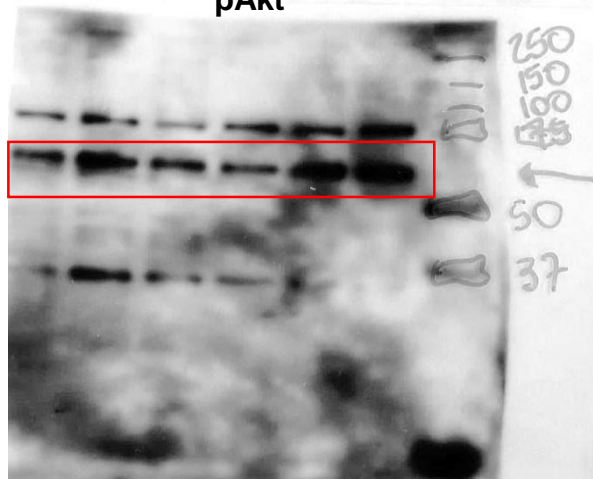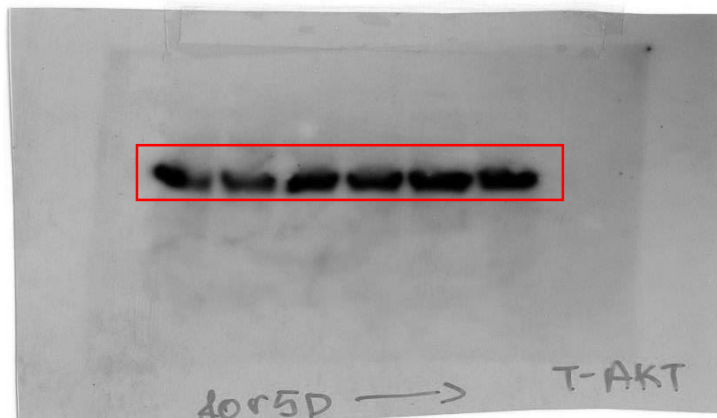

**Supplemental Fig. S3D**

**PP2A-C  
(MetL309)**

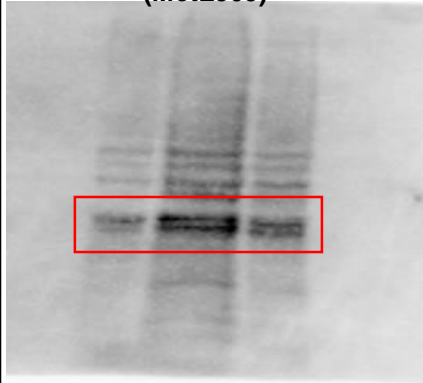

**PP2A-C  
(pY307)**

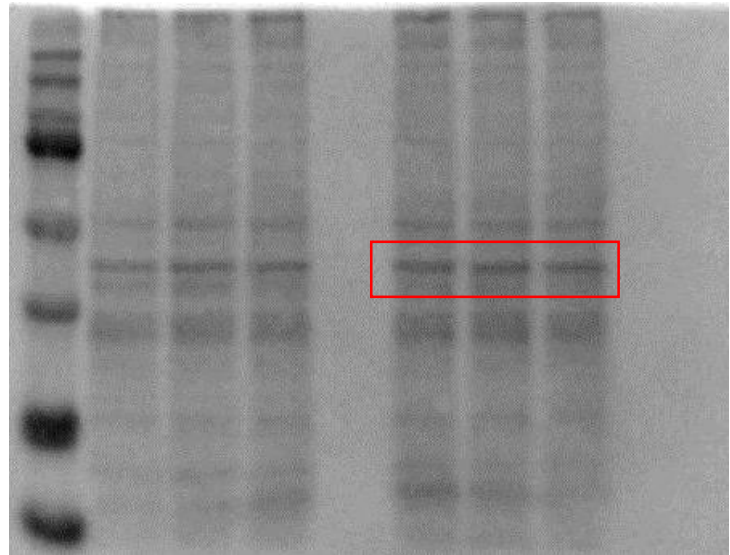

**PP2A-C**

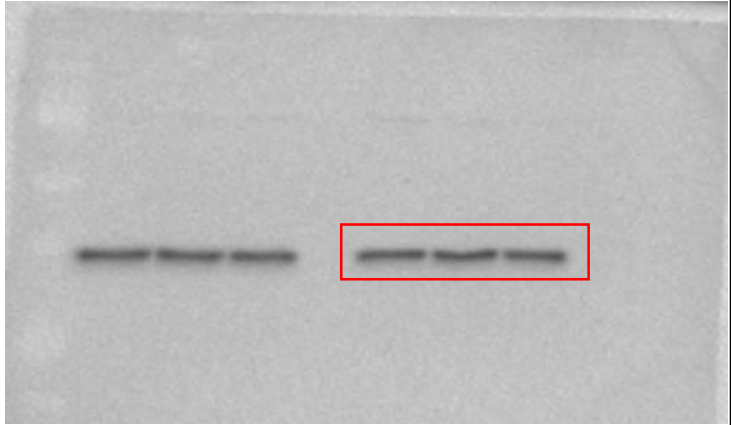



# Supplemental Fig. S4A

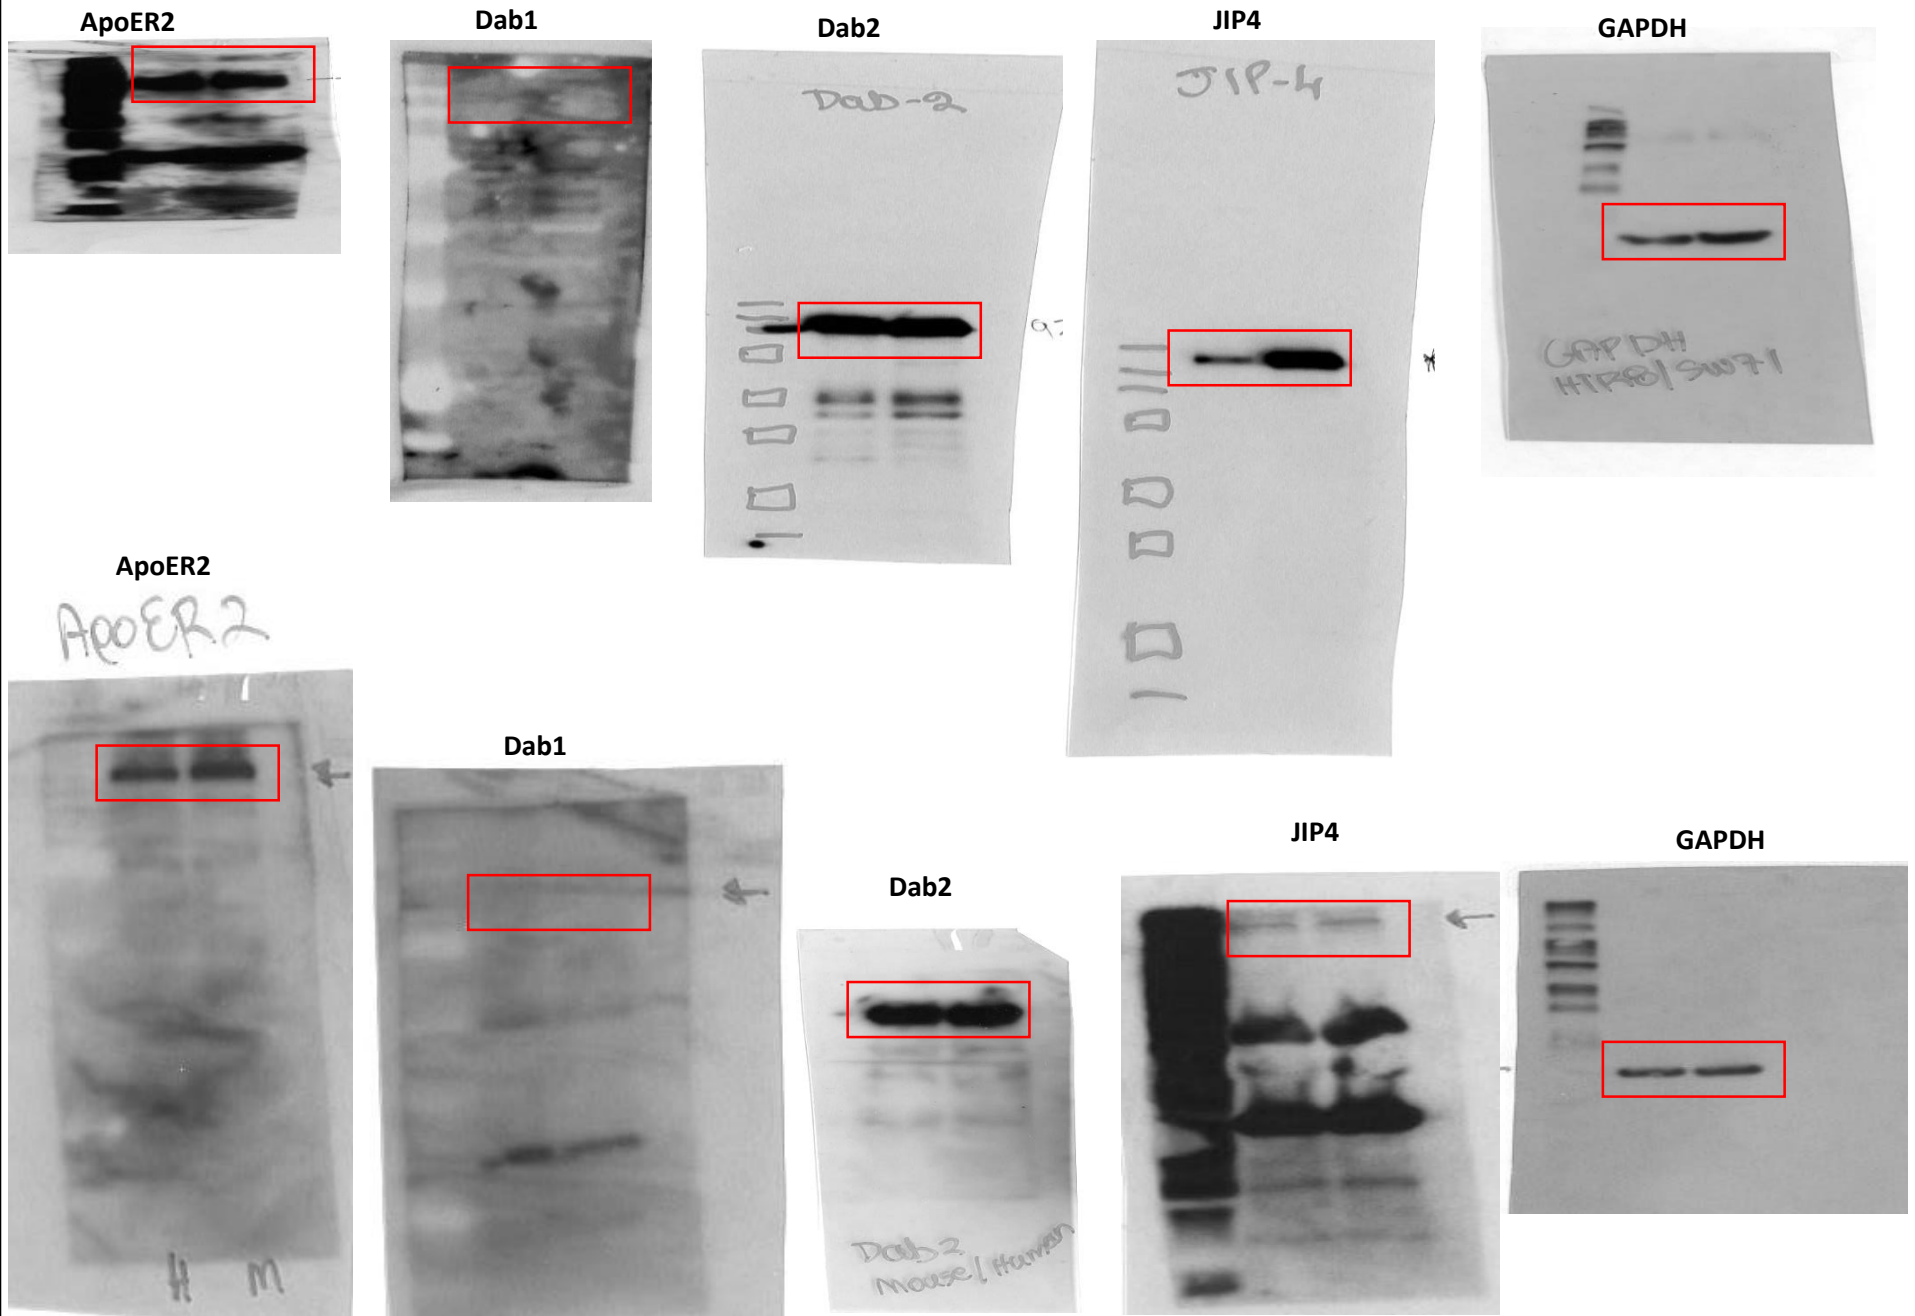

Supplemental Fig. S4B

ApoER2

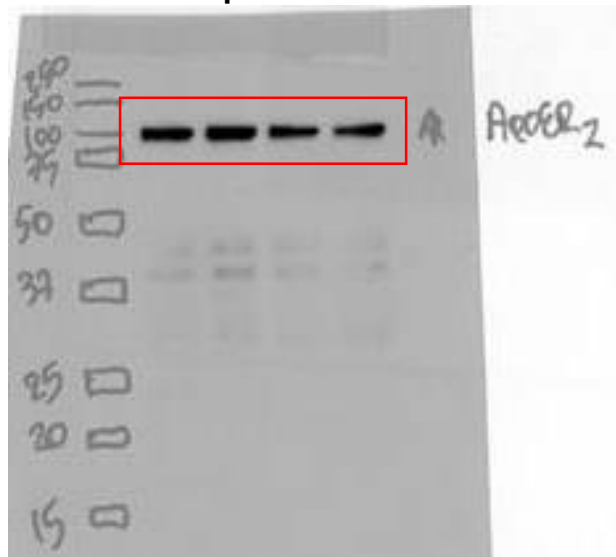

Dab2

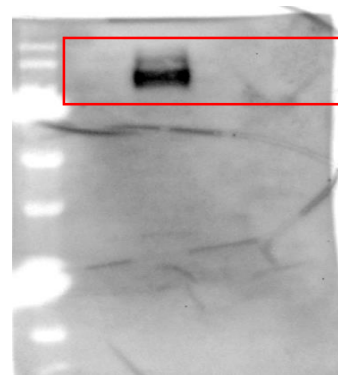

Supplemental Fig. S4C

ApoER2

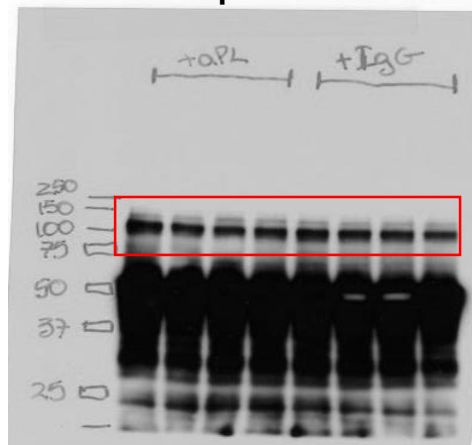

Dab2

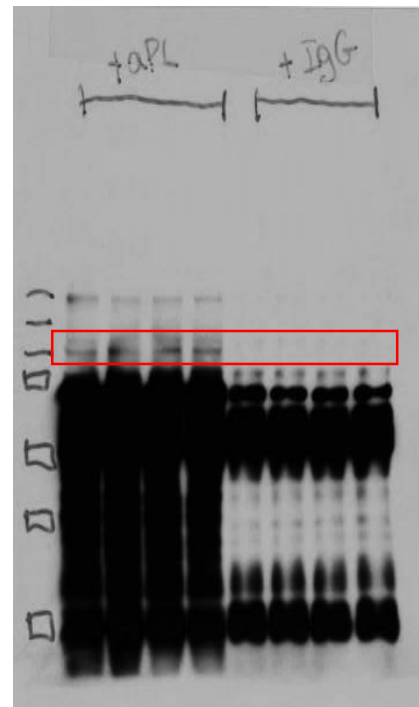

**Supplemental Fig. S4D**

**Dab2**

**GAPDH**

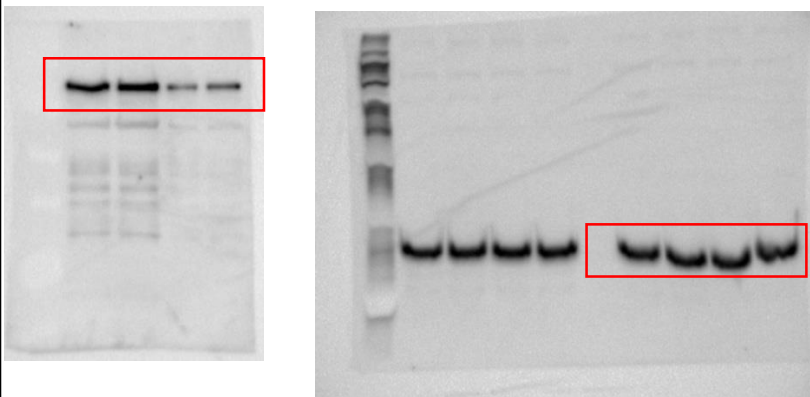

**Supplemental Fig. S4H**

**ApoER2**

**GAPDH**

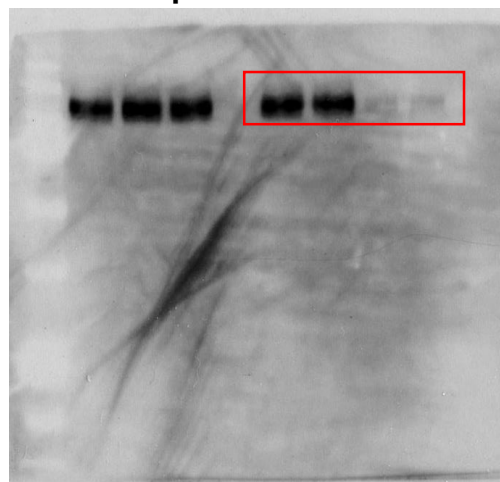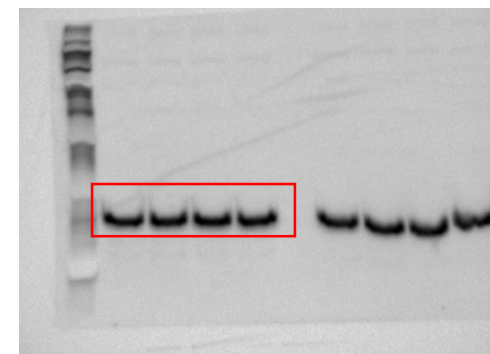

**Dab2**

**GAPDH**

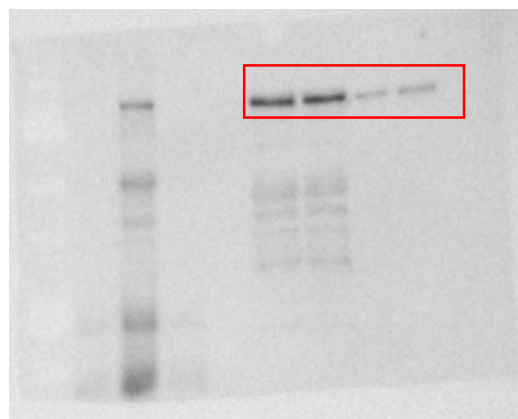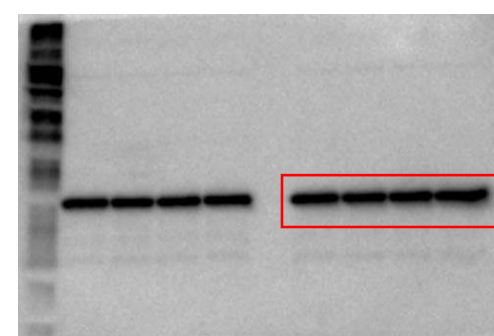

**Supplemental Fig. S5A**

**ApoER2**

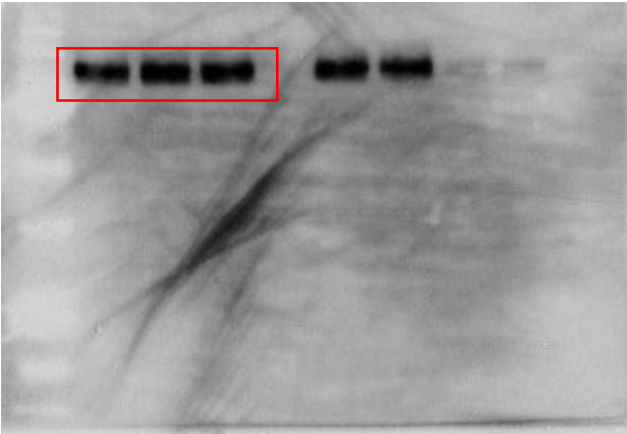

**Dab2**

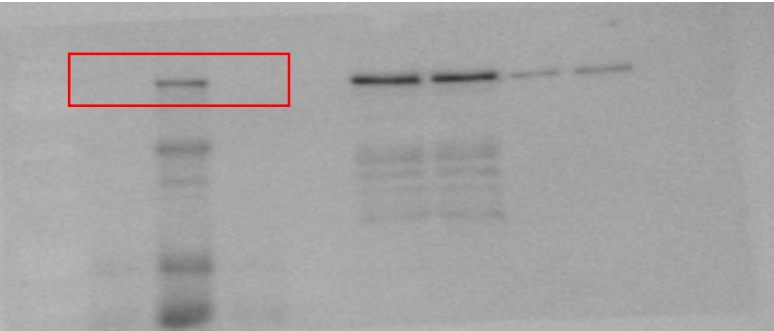

**PP2A-C  
(Met-L309)**

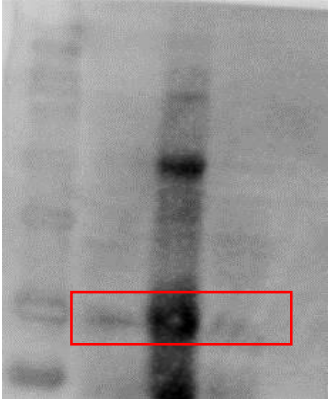

**JIP4**

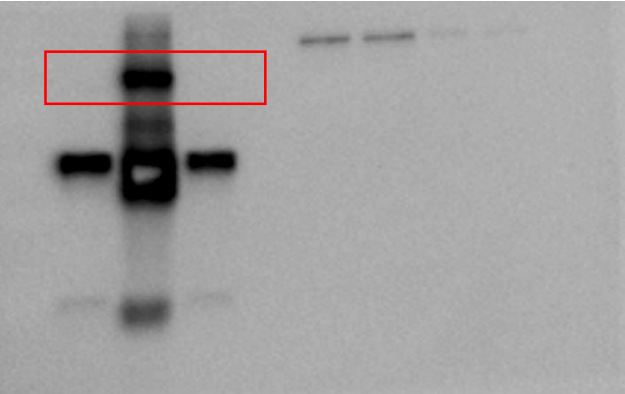

**PP2A-A**

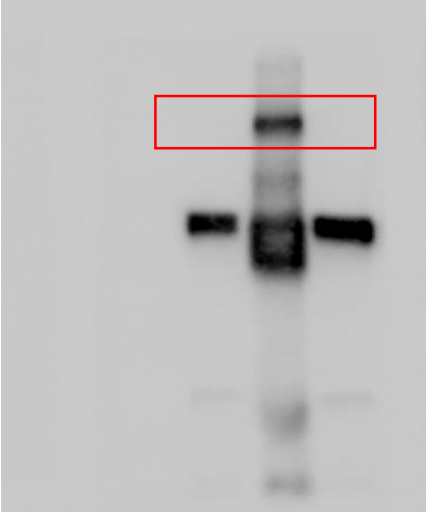

**Supplemental Fig. S5C**

**p-JNK**

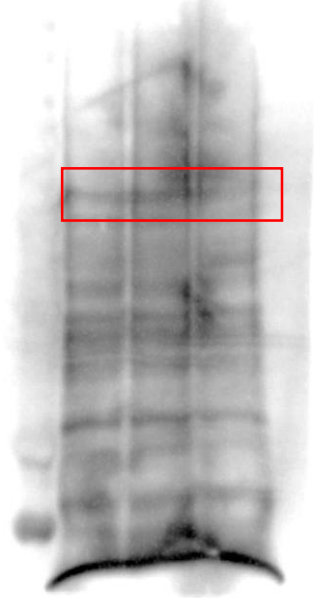

**JNK**

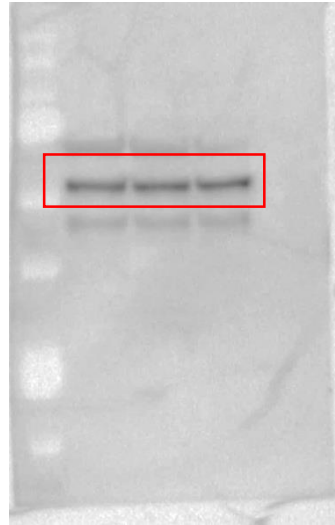

Supplement: NIHMS1734149-supplement-318941_Uncut_Gel_Blots.pdf [file NIHMS1734149-supplement-318941_Uncut_Gel_Blots.pdf]
